# Supplementary material
Source: PubMed Central journal article supplement (PMC6700465)

(a)

IgA-coated fraction

IgA-uncoated fraction

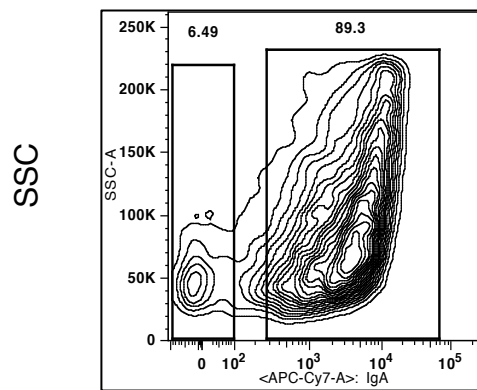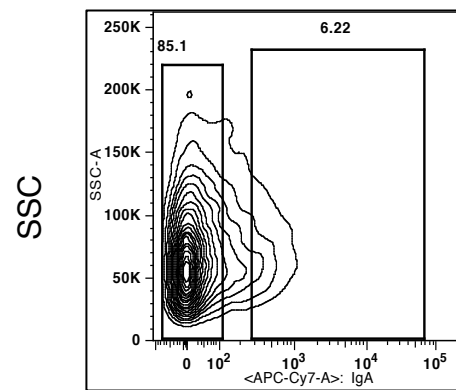

IgA

IgA

(b)

Ampicillin (Amp)-treatment

(c)

Metronidazole (MNZ)-treatment

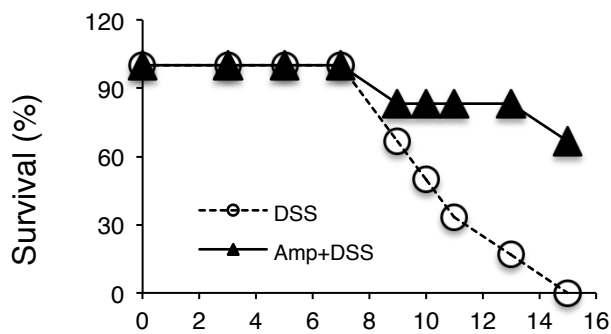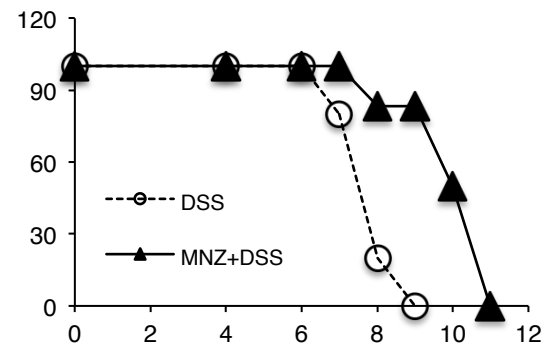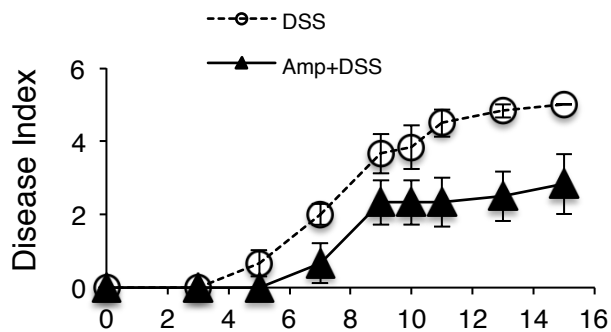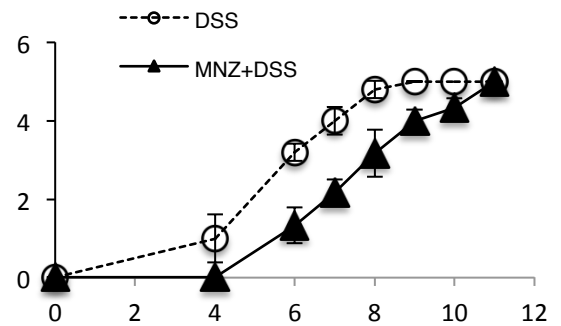

Supplement: IMM-158-19-s003.pdf [file IMM-158-19-s003.pdf]
