# Supplementary material
Source: PubMed Central journal article supplement (PMC6700465)

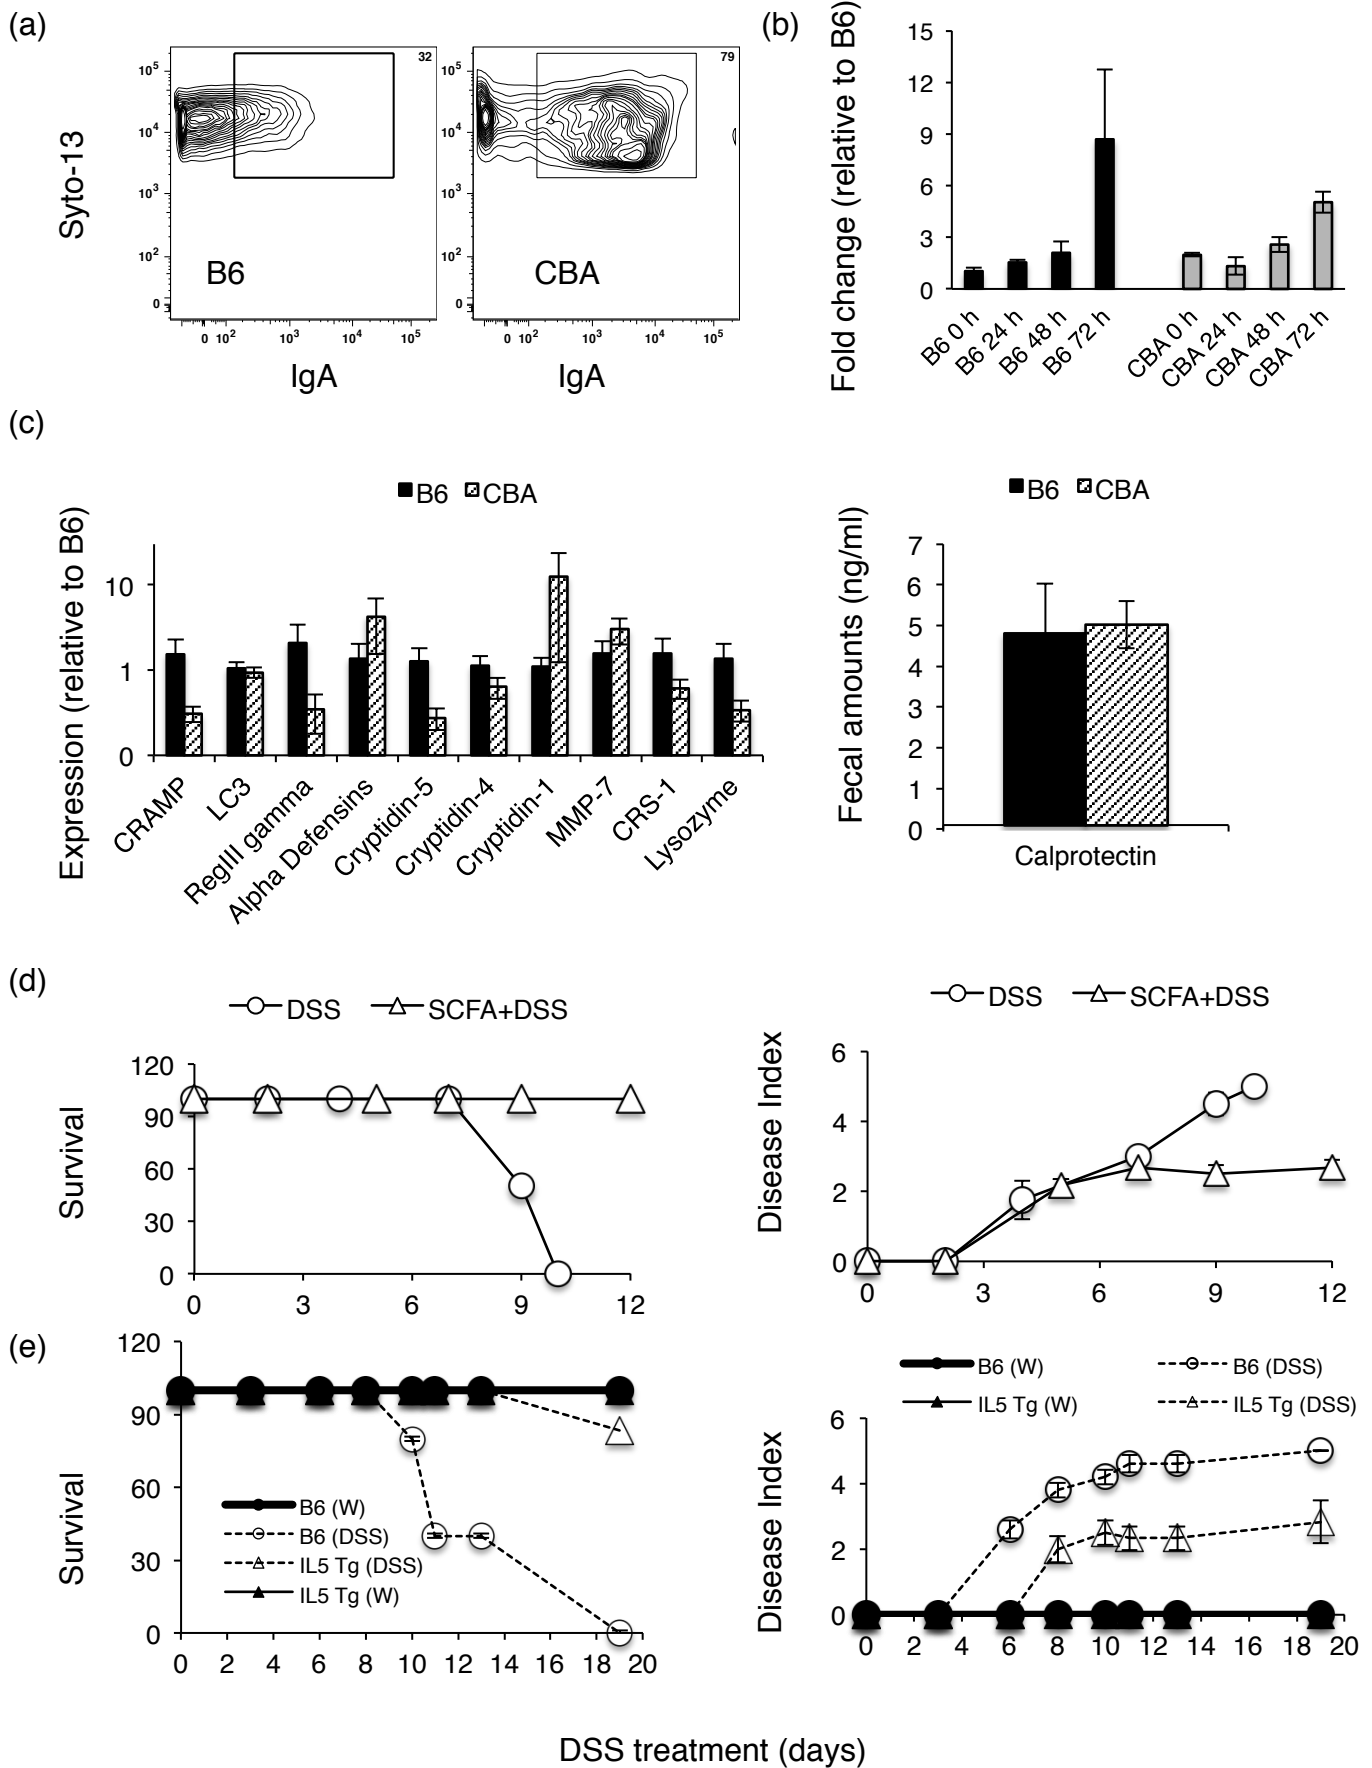

Supplement: IMM-158-19-s001.pdf [file IMM-158-19-s001.pdf]

Fold change (relative to B6 on water)

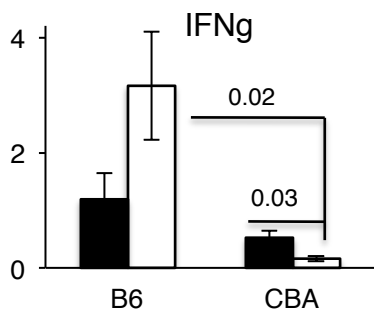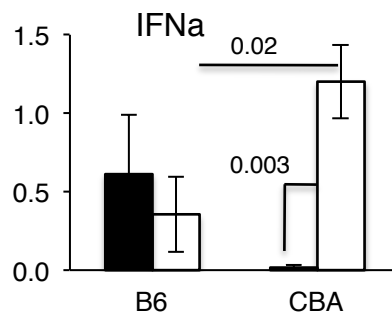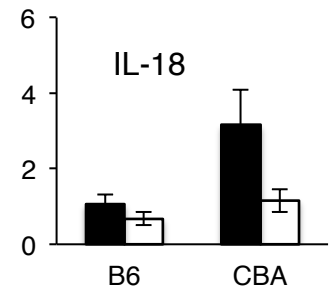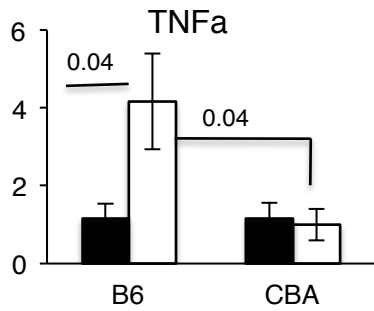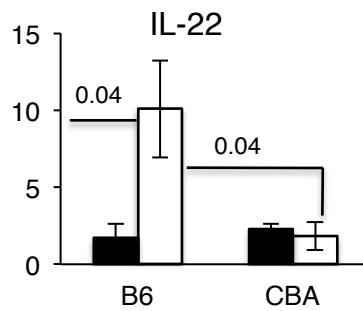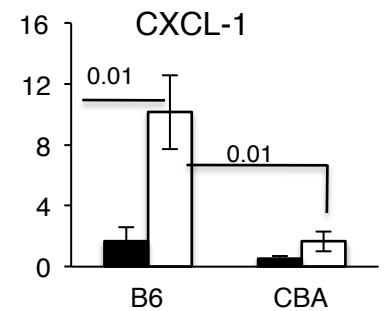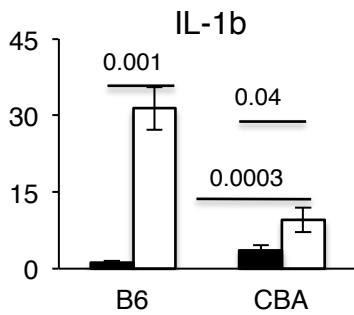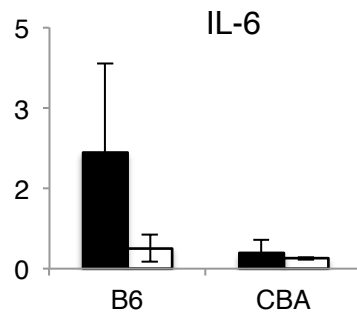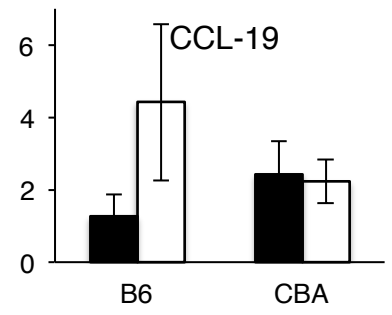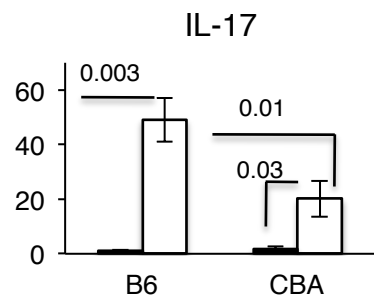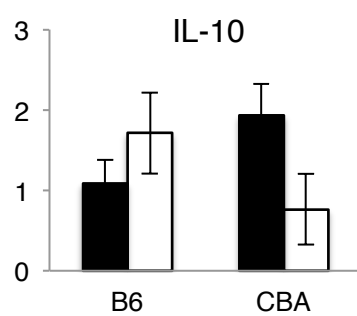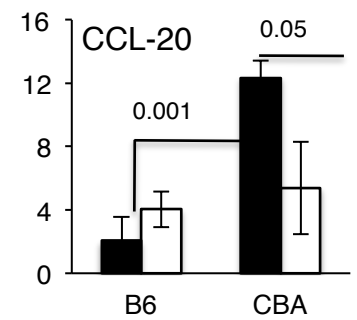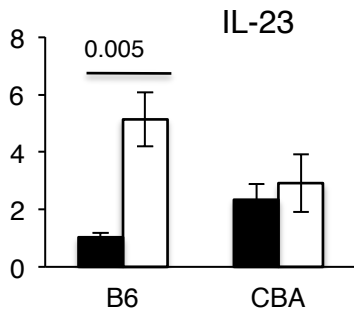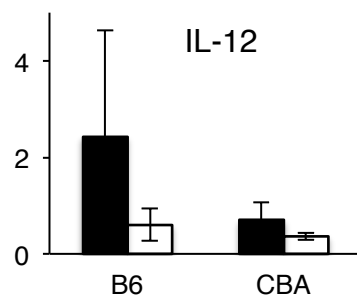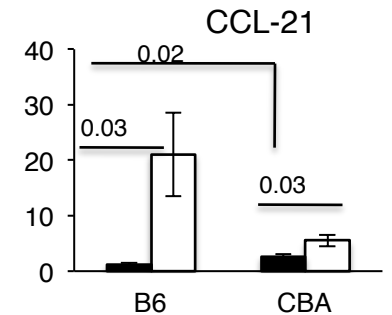

Supplement: IMM-158-19-s002.pdf [file IMM-158-19-s002.pdf]

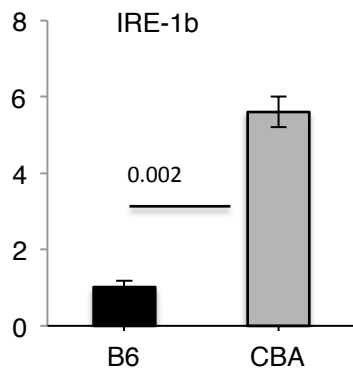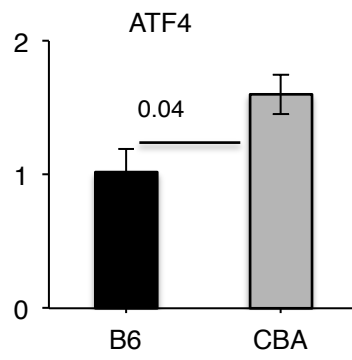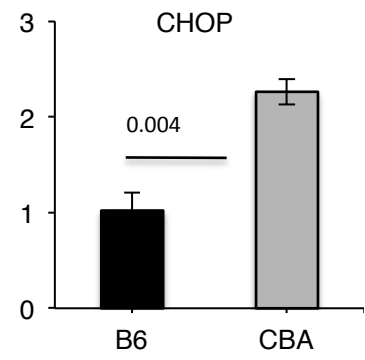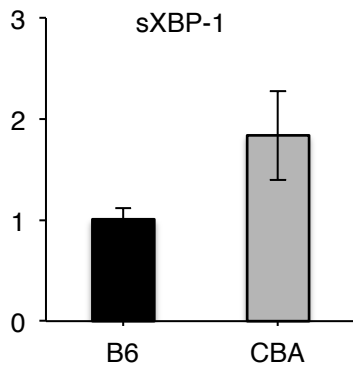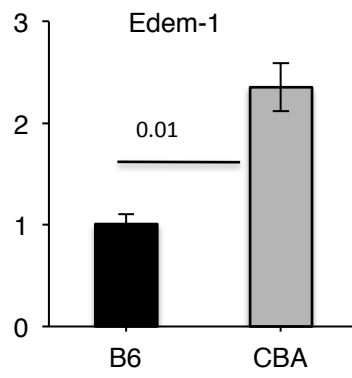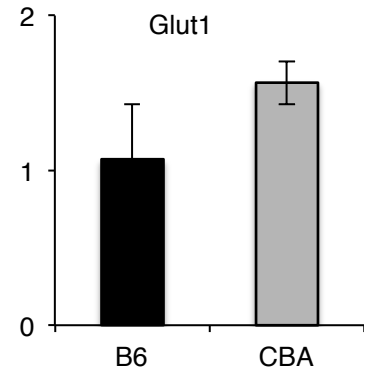

Supplement: IMM-158-19-s004.pdf [file IMM-158-19-s004.pdf]
